# Supplementary material for: Resting Blood Pressure in Master Athletes: Immune from Hypertension?
Source: MDPI journal article supplement (doi:10.3390/sports11040085), 2023-04-18
Supplement: s1 [file s1]

## Resting Blood Pressure in Master Athletes: Immune from Hypertension?

STROBE Statement—checklist of items that should be included in reports of observational studies

|                      | Item No. | Recommendation                                                                                                                                                                                                                                                                                                                                                                                                                                 | Page No. | Relevant lines from manuscript                                                                                                                                                                                    |
|----------------------|----------|------------------------------------------------------------------------------------------------------------------------------------------------------------------------------------------------------------------------------------------------------------------------------------------------------------------------------------------------------------------------------------------------------------------------------------------------|----------|-------------------------------------------------------------------------------------------------------------------------------------------------------------------------------------------------------------------|
| Title and abstract   | 1        | (a) Indicate the study’s design with a commonly used term in the title or the abstract                                                                                                                                                                                                                                                                                                                                                         |          | Abstract 20                                                                                                                                                                                                       |
|                      |          | (b) Provide in the abstract an informative and balanced summary of what was done and what was found                                                                                                                                                                                                                                                                                                                                            |          | 18-32                                                                                                                                                                                                             |
| Introduction         |          |                                                                                                                                                                                                                                                                                                                                                                                                                                                |          |                                                                                                                                                                                                                   |
| Background/rationale | 2        | Explain the scientific background and rationale for the investigation being reported                                                                                                                                                                                                                                                                                                                                                           |          | 37-124, rationale 111-119                                                                                                                                                                                         |
| Objectives           | 3        | State specific objectives, including any prespecified hypotheses                                                                                                                                                                                                                                                                                                                                                                               |          | 119-124                                                                                                                                                                                                           |
| Methods              |          |                                                                                                                                                                                                                                                                                                                                                                                                                                                |          | 125-201                                                                                                                                                                                                           |
| Study design         | 4        | Present key elements of study design early in the paper                                                                                                                                                                                                                                                                                                                                                                                        |          | Ethics 126-135<br>Survey design 136-142<br>Participants and survey 143-159<br>Biometric classifications 162-181<br>Comparative data 183-188                                                                       |
| Setting              | 5        | Describe the setting, locations, and relevant dates, including periods of recruitment, exposure, follow-up, and data collection                                                                                                                                                                                                                                                                                                                |          | Survey was open 9/2009 and closed 12/2009 135-137                                                                                                                                                                 |
| Participants         | 6        | (a) Cohort study—Give the eligibility criteria, and the sources and methods of selection of participants. Describe methods of follow-up<br>Case-control study—Give the eligibility criteria, and the sources and methods of case ascertainment and control selection. Give the rationale for the choice of cases and controls<br>Cross-sectional study—Give the eligibility criteria, and the sources and methods of selection of participants |          | Eligibility 143-145<br>Selection 137-138 (convenience sample)<br>no follow-up<br>184-188, ABS data selected as represents general Australia population, NHANES data selected an 2 <sup>nd</sup> comparative group |
|                      |          | (b) Cohort study—For matched studies, give matching criteria and number of exposed and unexposed                                                                                                                                                                                                                                                                                                                                               |          | NA                                                                                                                                                                                                                |

|                                                                                                            |    |                                                                                                                                                                                      |                                                                                                    |
|------------------------------------------------------------------------------------------------------------|----|--------------------------------------------------------------------------------------------------------------------------------------------------------------------------------------|----------------------------------------------------------------------------------------------------|
| <i>Case-control study</i> —For matched studies, give matching criteria and the number of controls per case |    |                                                                                                                                                                                      |                                                                                                    |
| Variables                                                                                                  | 7  | Clearly define all outcomes, exposures, predictors, potential confounders, and effect modifiers.<br>Give diagnostic criteria, if applicable                                          | Biometrics classifications 163-181 as per RACGP classifications                                    |
| Data sources/<br>measurement                                                                               | 8* | For each variable of interest, give sources of data and details of methods of assessment (measurement). Describe comparability of assessment methods if there is more than one group | Biometrics classifications 163-181 as per RACGP classifications                                    |
| Bias                                                                                                       | 9  | Describe any efforts to address potential sources of bias                                                                                                                            | Bias is addressed in the limitations but includes sampling bias, response bias, non-response -bias |
| Study size                                                                                                 | 10 | Explain how the study size was arrived at                                                                                                                                            | NA, a convenience sample was used 138-140                                                          |

Continued on next page

|                        |     |                                                                                                                                                                                                   |                                                                                                                                                                                                   |
|------------------------|-----|---------------------------------------------------------------------------------------------------------------------------------------------------------------------------------------------------|---------------------------------------------------------------------------------------------------------------------------------------------------------------------------------------------------|
| Quantitative variables | 11  | Explain how quantitative variables were handled in the analyses. If applicable, describe which groupings were chosen and why                                                                      | All quantitative variables were standard clinical measures with classifications used according to the RACGP 164-183                                                                               |
| Statistical methods    | 12  | (a) Describe all statistical methods, including those used to control for confounding                                                                                                             | 192-203                                                                                                                                                                                           |
|                        |     | (b) Describe any methods used to examine subgroups and interactions                                                                                                                               | WMG participants were sub grouped by gender and by decade of age                                                                                                                                  |
|                        |     | (c) Explain how missing data were addressed                                                                                                                                                       |                                                                                                                                                                                                   |
|                        |     | (d) <i>Cohort study</i> —If applicable, explain how loss to follow-up was addressed                                                                                                               | NA                                                                                                                                                                                                |
|                        |     | <i>Case-control study</i> —If applicable, explain how matching of cases and controls was addressed                                                                                                | NA                                                                                                                                                                                                |
|                        |     | <i>Cross-sectional study</i> —If applicable, describe analytical methods taking account of sampling strategy                                                                                      | Sampling strategy was to sample all WMG participants who registered with a valid email address.127-144                                                                                            |
|                        |     | (e) Describe any sensitivity analyses                                                                                                                                                             | NA                                                                                                                                                                                                |
| <b>Results</b>         |     |                                                                                                                                                                                                   |                                                                                                                                                                                                   |
| Participants           | 13* | (a) Report numbers of individuals at each stage of study—eg numbers potentially eligible, examined for eligibility, confirmed eligible, included in the study, completing follow-up, and analysed | Fig 1 CONSORT diagram                                                                                                                                                                             |
|                        |     | (b) Give reasons for non-participation at each stage                                                                                                                                              | Fig 1 CONSORT diagram                                                                                                                                                                             |
|                        |     | (c) Consider use of a flow diagram                                                                                                                                                                | Fig 1 CONSORT diagram                                                                                                                                                                             |
| Descriptive data       | 14* | (a) Give characteristics of study participants (eg demographic, clinical, social) and information on exposures and potential confounders                                                          | Table 1, age, smoking status, drinking status, ect                                                                                                                                                |
|                        |     | (b) Indicate number of participants with missing data for each variable of interest                                                                                                               | As per Methods, only participants with both SBP and DBP were included in this study. Fig 1 shown that a total of 8,070 participants completed our study, however only 2,793 submitted BP results. |
|                        |     | (c) <i>Cohort study</i> —Summarise follow-up time (eg, average and total amount)                                                                                                                  | NA                                                                                                                                                                                                |
| Outcome data           | 15* | <i>Cohort study</i> —Report numbers of outcome events or summary measures over time                                                                                                               | NA                                                                                                                                                                                                |
|                        |     | <i>Case-control study</i> —Report numbers in each exposure category, or summary measures of exposure                                                                                              | NA                                                                                                                                                                                                |

|                                                                                    |    |                                                                                                                                                                                                              |                                                            |
|------------------------------------------------------------------------------------|----|--------------------------------------------------------------------------------------------------------------------------------------------------------------------------------------------------------------|------------------------------------------------------------|
| <i>Cross-sectional study</i> —Report numbers of outcome events or summary measures |    |                                                                                                                                                                                                              | <i>See Table 1, Figures 3,4 and 5 and Results 204- 314</i> |
| Main results                                                                       | 16 | (a) Give unadjusted estimates and, if applicable, confounder-adjusted estimates and their precision (eg, 95% confidence interval). Make clear which confounders were adjusted for and why they were included | 95% Cis listed for select variables in Table 1             |
|                                                                                    |    | (b) Report category boundaries when continuous variables were categorized                                                                                                                                    | RACGP classifications 164-184                              |
|                                                                                    |    | (c) If relevant, consider translating estimates of relative risk into absolute risk for a meaningful time period                                                                                             | NA                                                         |

Continued on next page

|                          |    |                                                                                                                                                                            |                                              |
|--------------------------|----|----------------------------------------------------------------------------------------------------------------------------------------------------------------------------|----------------------------------------------|
| Other analyses           | 17 | Report other analyses done—eg analyses of subgroups and interactions, and sensitivity analyses                                                                             | 204-314, T-tests, ANOVA, correlations        |
| <b>Discussion</b>        |    |                                                                                                                                                                            |                                              |
| Key results              | 18 | Summarise key results with reference to study objectives                                                                                                                   | 316-324                                      |
| Limitations              | 19 | Discuss limitations of the study, taking into account sources of potential bias or imprecision. Discuss both direction and magnitude of any potential bias                 | Section 4.2 Strengths and Limitation 474-501 |
| Interpretation           | 20 | Give a cautious overall interpretation of results considering objectives, limitations, multiplicity of analyses, results from similar studies, and other relevant evidence | 204-501                                      |
| Generalisability         | 21 | Discuss the generalisability (external validity) of the study results                                                                                                      | 508                                          |
| <b>Other information</b> |    |                                                                                                                                                                            |                                              |
| Funding                  | 22 | Give the source of funding and the role of the funders for the present study and, if applicable, for the original study on which the present article is based              | No funding was provided for this study. 517  |

\*Give information separately for cases and controls in case-control studies and, if applicable, for exposed and unexposed groups in cohort and cross-sectional studies.

**Note:** An Explanation and Elaboration article discusses each checklist item and gives methodological background and published examples of transparent reporting. The STROBE checklist is best used in conjunction with this article (freely available on the Web sites of PLoS Medicine at <http://www.plosmedicine.org/>, Annals of Internal Medicine at <http://www.annals.org/>, and Epidemiology at <http://www.epidem.com/>). Information on the STROBE Initiative is available at [www.strobe-statement.org](http://www.strobe-statement.org).
